# Supplementary material for: Systematic analysis of the role of LDHs subtype in pan-cancer demonstrates the importance of LDHD in the prognosis of hepatocellular carcinoma patients
Source: BMC Cancer. 2024 Jan 31;24:156. doi: 10.1186/s12885-024-11920-8 (PMC10829303; doi:10.1186/s12885-024-11920-8)
Supplement: Supplementary file 2 — Additional file 2: Table S1. Prognostic risk of LDH in pan-cancer analysed by Cox regression. Different coloured lines represent risk values for different genes in the tumour. Risk ratios <1 indicate low risk and risk ratios >1 indicate high risk. [file 12885_2024_11920_MOESM2_ESM.xlsx]

## Sheet: Sheet1
LDHA					LDHB				LDHC				LDHD
cancer	HR	HR.95L	HR.95H	pvalue	HR	HR.95L	HR.95H	pvalue	HR	HR.95L	HR.95H	pvalue	HR	HR.95L	HR.95H	pvalue
ACC	1.59112	1.07162	2.36245	0.021281	1.29778	0.731811	2.30146	0.372525	0.482667	0.130035	1.79158	0.276342	0.515476	0.367164	0.723697	0.000129
BLCA	1.08259	0.936145	1.25194	0.284557	0.970663	0.841038	1.12027	0.683908	0.896654	0.609464	1.31917	0.579738	0.988636	0.871991	1.12088	0.858389
BRCA	0.950998	0.735676	1.22934	0.701283	0.994438	0.89001	1.11112	0.921514	0.939035	0.668057	1.31993	0.717278	1.06308	0.893953	1.2642	0.488998
CESC	1.61699	1.15905	2.25587	0.004672	1.08189	0.894039	1.30921	0.418584	0.486454	0.31454	0.752328	0.001199	0.793922	0.621048	1.01492	0.065506
CHOL	1.21991	0.724829	2.05316	0.454236	1.07775	0.801155	1.44985	0.620716	1.61556	0.188311	13.8601	0.661811	1.28567	0.843625	1.95932	0.242437
COAD	1.06917	0.748485	1.52727	0.713142	1.00686	0.853785	1.18738	0.935235	1.14222	0.692814	1.88313	0.602177	1.03258	0.846346	1.25978	0.75207
DLBC	0.514706	0.209823	1.26259	0.146871	1.76157	0.442395	7.01435	0.421896	1.09277	0.265613	4.49582	0.902159	0.350675	0.074219	1.6569	0.185959
ESCA	1.21257	0.857502	1.71468	0.275568	1.02157	0.844096	1.23635	0.826525	1.12641	0.638343	1.98766	0.681202	1.00288	0.780299	1.28896	0.982061
GBM	1.32105	1.04467	1.67054	0.020081	0.59553	0.393424	0.901459	0.014269	0.837877	0.482225	1.45583	0.530312	1.13962	0.877293	1.48037	0.327508
HNSC	1.25307	1.03653	1.51485	0.019771	1.11557	0.974101	1.27758	0.113947	0.576015	0.383465	0.865249	0.00788	0.92002	0.783408	1.08045	0.309423
KICH	5.90769	2.39477	14.5738	0.000115	0.667517	0.240725	1.85098	0.437315	0.303003	0.023788	3.85955	0.357732	0.234854	0.098148	0.561974	0.001136
KIRC	0.884653	0.711744	1.09957	0.26936	0.915581	0.714991	1.17245	0.484535	1.19113	0.791042	1.79357	0.4023	0.701735	0.598711	0.822487	1.23e-05
KIRP	1.57732	1.09237	2.27755	0.015044	1.08574	0.724679	1.6267	0.690035	1.26264	0.532244	2.99534	0.596735	0.670777	0.546692	0.823026	0.00013
LAML	1.2173	0.742192	1.99655	0.436022	0.984101	0.769843	1.25799	0.898208	2.05811	1.06383	3.98169	0.032055	1.09989	0.762598	1.58636	0.610382
LGG	1.62601	1.33812	1.97584	1.01e-06	0.315931	0.219847	0.454008	4.72e-10	1.23273	0.767062	1.98108	0.387376	0.780523	0.629612	0.967607	0.0238
LIHC	1.89141	1.47291	2.42883	5.89e-07	1.10455	0.95409	1.27875	0.183209	1.18116	0.871915	1.60008	0.282375	0.764845	0.665583	0.878911	0.000157
LUAD	1.75311	1.42264	2.16035	1.38e-07	1.13447	0.983691	1.30836	0.082923	1.14056	0.854462	1.52245	0.372095	0.820211	0.712347	0.944407	0.005868
LUSC	1.12778	0.917444	1.38634	0.253531	1.0308	0.909436	1.16837	0.635019	1.09723	0.815952	1.47547	0.539206	0.986869	0.853843	1.14062	0.858001
MESO	0.942199	0.655645	1.35399	0.747583	1.61194	1.04516	2.48606	0.030788	0.72478	0.30964	1.69651	0.458197	0.687418	0.433219	1.09077	0.111581
OV	0.915194	0.775412	1.08017	0.294655	1.1138	0.955197	1.29873	0.169099	1.09311	0.833507	1.43357	0.519879	0.967972	0.821369	1.14074	0.697654
PAAD	2.03933	1.49265	2.78622	7.62e-06	1.02197	0.818585	1.27588	0.847806	0.763156	0.410357	1.41927	0.393184	1.12388	0.854274	1.47856	0.404001
PCPG	1.78243	0.865555	3.67055	0.116832	1.19178	0.399089	3.55894	0.753281	0.794684	0.029709	21.2567	0.890989	0.668977	0.271987	1.64541	0.381321
PRAD	2.25189	1.09998	4.61008	0.026375	1.11187	0.611654	2.02116	0.728016	0.266952	0.023477	3.03546	0.286982	0.844085	0.482731	1.47594	0.55216
READ	0.658555	0.355669	1.21938	0.183868	0.832939	0.605629	1.14556	0.260931	1.95422	0.7454	5.12341	0.173057	0.952688	0.640693	1.41661	0.810762
SARC	1.13008	0.902572	1.41494	0.286322	1.24607	0.965228	1.60862	0.091344	0.862177	0.513887	1.44652	0.574323	0.795289	0.568217	1.11311	0.181781
SKCM	0.975375	0.821276	1.15839	0.776269	1.13769	0.950251	1.3621	0.160194	0.996354	0.818925	1.21223	0.970879	0.911977	0.777005	1.0704	0.259528
STAD	1.07154	0.853461	1.34534	0.551748	1.06073	0.929747	1.21016	0.380645	0.723675	0.47542	1.10156	0.131371	1.05696	0.909728	1.22802	0.46918
TGCT	1.48182	0.460015	4.77328	0.509941	1.11444	0.362339	3.42766	0.85008	0.660651	0.077685	5.61833	0.704275	2.40722	0.772401	7.50218	0.129853
THCA	1.43119	0.521257	3.92958	0.48662	0.850053	0.312331	2.31354	0.750472	0.948519	0.151334	5.94504	0.954991	1.24499	0.80005	1.93737	0.33144
THYM	1.11108	0.368574	3.34938	0.851588	0.537348	0.231598	1.24674	0.148065	1.3305	0.462406	3.82829	0.596418	1.07528	0.51276	2.25492	0.847657
UCEC	0.915303	0.711643	1.17725	0.490694	1.05268	0.839059	1.32069	0.657308	0.989848	0.607752	1.61217	0.967296	0.911239	0.750248	1.10678	0.348697
UCS	1.27096	0.863694	1.87026	0.223797	1.29417	0.769943	2.17531	0.330433	0.819258	0.340159	1.97315	0.656663	1.042	0.55566	1.95399	0.897958
UVM	1.04343	0.475043	2.29189	0.915665	1.10807	0.430893	2.84946	0.831371	0.631856	0.376321	1.06091	0.082503	0.750273	0.502039	1.12125	0.161015
