# Supplementary material for: Systematic analysis of the role of LDHs subtype in pan-cancer demonstrates the importance of LDHD in the prognosis of hepatocellular carcinoma patients
Source: BMC Cancer. 2024 Jan 31;24:156. doi: 10.1186/s12885-024-11920-8 (PMC10829303; doi:10.1186/s12885-024-11920-8)
Supplement: Supplementary file 3 — Additional file 3: Table S2. TCGA liver cancer patient characteristics. [file 12885_2024_11920_MOESM3_ESM.xlsx]

## Sheet: Sheet1
TCGA liver cancer patient characteristics.
Characteristic	Low expression of LDHD	High expression of LDHD	p
n	187	187
T-stage, n(%)
T1	77(20.9%)	104(28.3%)	0.002
T2	53(14.4%)	41(11.1%)
T3	49(13.3%)	31(8.4%)
T4	8(2.1%)	5(1.4%)
N-stage, n(%)			0.412
N0	137(53.5%)	115(44.9%)
N1	3(1.1%)	1(0.4%)
M-stage, n(%)
M0	145(53.7%)	121(44.8%)	0.858
M1	2(0.07%)	2(0.07%)
Pathologic Stage, n(%)
Stage I	73(21.1%)	98(28.5%)	0.002
Stage II	49(14.2%)	37(10.8%)
Stage III	52(15.1%)	30(8.7%)
Stage IV	2(0.6%)	3(0.8%)
Histological Grade, n(%)
G1	16(4.4%)	39(10.7%)	0
G2	79(21.6%)	98(26.8%)
G3	82(22.4%)	40(10.9%)
G4	9(2.5%)	3(0.8%)
Gender
Female	70(18.9%)	51(13.7%)	0.046
Male	117(31.5%)	133(35.8%)
Age, n(%)
<=60	111(30%)	66(17.8%)	0
>60	75(20.3%)	118(31.9%)
Cancer_status
tumor free	115(33.4%)	119(34.6%)	0.644
with tumor	57(16.6%)	53(15.4%)
Residual tumor, n (%)
R0	162(47.5)	162(47.5%)	0.813
R1	9(2.6%)	8(2.3%)
OS event, n (%)
Alive	146(39.4%)	136(36.7%)	0.349
Death	41(11.1%)	48(12.9%)
Race
asian	106(29.5%)	52(14.5%)	0
black or african american	7(1.9%)	10(2.8%)
white	69(19.2%)	115(32.0%)
AFP
>=400	53(19.1%)	12(4.3%)	0
<400	82(29.5%)	131(47.1%)
