# Supplementary material for: Systematic analysis of the role of LDHs subtype in pan-cancer demonstrates the importance of LDHD in the prognosis of hepatocellular carcinoma patients
Source: BMC Cancer. 2024 Jan 31;24:156. doi: 10.1186/s12885-024-11920-8 (PMC10829303; doi:10.1186/s12885-024-11920-8)
Supplement: Supplementary file 4 — Additional file 4: Table S3. LDHD expression correlated with clinical pathological characteristics (logistic regression). [file 12885_2024_11920_MOESM4_ESM.xlsx]

## Sheet: Sheet1
LDHD expression correlated with clinical pathological characteristics (logistic regression).
Characteristics	Total(N)	Odds Ratio(OR)	p value
T stage (T3 vs. T1)	261	0.494(0.287-0.840)	0.01
N stage (N1 vs. N0)	256	1 (0.118–8.440)	1
M stage (M1 vs. M0)	270	1(0.119–8.434)	1
Pathological stage (Stage III vs. Stage I)	256	0.408 (0.237–0.693)	0.001
Histological grade (G4 vs. G1)	67	0.131(0.028-0.524)	0.006
Age(>65 vs <=65)	370	2.705(1.781-4.136)	3.57e-06
gender(Female vs Male)	371	1.586(1.025-2.465)	0.039
Residual tumour (R1 vs. R0)	341	0.889(0.326-2.381)	0.813
Race (White vs. Asian)	342	3.380(2.174-5.307)	8.57e-08
Tumour status (with tumour vs. tumour-free)	344	0.896(0.570–1.414)	0.044
AFP(>400 vs. <=400)	278	0.103(0.045-0.209)	3.543e-09
