# Supplementary material for: Systematic analysis of the role of LDHs subtype in pan-cancer demonstrates the importance of LDHD in the prognosis of hepatocellular carcinoma patients
Source: BMC Cancer. 2024 Jan 31;24:156. doi: 10.1186/s12885-024-11920-8 (PMC10829303; doi:10.1186/s12885-024-11920-8)
Supplement: Supplementary file 5 — Additional file 5: Table S4. Univariate analysis and multivariate analyses of liver cancer patient overall survival. [file 12885_2024_11920_MOESM5_ESM.xlsx]

## Sheet: Sheet1
	Univariate analysis and multivariate analyses of liver cancer patient overall survival.
	Characterical	Univariate analysis		Multivariate analysis
		Hazard ratio(95%Cl)	p value	Hazard ratio(95%Cl)	p value
	T stage(T2&T3&T4 vs.T1)	1.793(1.407-2.285)	2.34e-06	2.271(0.948-5.439)	0.066
	N stage(N1&N2&N3 vs.N0)	2.167(0.529-8.880)	0.283	3.078(0.518-18.300)	0.216
	Pathological stage(StageⅡ&stageⅢ&Stage Ⅳ vs.stage Ⅰ)	1.852(1.417-2.421)	6.5e-06	0.747(0.280-1.992)	0.561
	Age(>60 vs.≤60 years)	1.006(0.987-1.025)	0.535	1.016(0.995-1.037)	0.129
	Gender(male vs.female）	0.798(0.492-1.294)	0.36	1.067(0.636-1.790)	0.805
	Histological grade（G2&G3&G4 vs.G1）	1.016(0.741-1.393)	0.919	0.975(0.695-1.369)	0.884
	LDHD(high vs.low)	0.729(0.625-0.852)	6.5e-05	0.740(0.631-0.869)	0.0002
